# Supplementary material
Source: publisher figshare collection journal article supplement (https://tandf.figshare.com/ndownloader/files/15327644)
Supplement: Supplementary file 1 [file 15327644]

## Sheet: Sheet1
Supplement Table S2: Results of ENT examination of Usher syndrome Russian cohort.
Patient ID	USH type	Tonal audiometry		Timpanometry						TEOAE		DIAGNOSIS
				Compliance		Pressure		Gradient
		AD	AS	AD	AS	AD	AS	AD	AS	AD	AS	AD	AS
1	2	58,75	60	0,62	0,7	-12	-18	0,23	0,42	-2,3	-1,2	CBNSHL III degree
2	1	120	120	0,6	0,7	0	5	0,33	0,4	-1,3	-1,9	CBNSHL IV degree, borderline with deafness
3	other syndrome	58,75	100	0,54	0,6	-12	-10	0,29	0,34	-5,6	-1,3	CBNSHL III degree	CBNSHL IV degree, borderline with deafness
4	2	55	55	na	na	na	na	na	na	na	na	CBNSHL II degree
5	2	81,25	76,25	0,39	0,45	0	0	0,34	0,31	-2,3	-5,9	CBNSHL IV degree
6	1	116,25	116,25	0,64	0,7	-16	-44	0,26	0,13	-5,2	-5	CBNSHL IV degree, borderline with deafness
7	1	120	120	0,33	0,64	-12	-28	0,11	0,26	-6	-4,3	CBNSHL IV degree, borderline with deafness.
8	2	81,25	82,5	0,42	0,46	0	0	0,38	0,41	-7,6	-2,6	CBNSHL IV degree
9	2	70	65	0,39	0,29	-2	-9	0,4	0,41	-1,2	-2,6	CBNSHL III degree
10	1	na	na	na	na	na	na	na	na	na	na	CBNSHL IV degree, borderline with deafness. Condition after cochlear implantation on the right
11	2	88,75	81,25	0,37	0,81	4	9	0,34	0,39	-2,3	1,2	CBNSHL IV degree
12	2	na	na	na	na	na	na	na	na	na	na	CBNSHL IV degree
13	1	72	70	na	na	na	na	na	na	na	na	CBNSHL III degree
14	other syndrome	65	65,25	0,42	0,4	0	-5	0,36	0,32	-2,6	-2,9	CBNSHL III degree
15	1	120	120	0,39	0,4	-26	-15	0,29	0,34	-8,9	-7,9	CBNSHL IV degree, borderline with deafness
16	1	65	68,5	0,42	0,41	-15	-12	0,36	0,41	-1,3	-1,2	CBNSHL III degree
17	2	110	110	0,47	0,42	-2	-5	0,41	0,45	-2,9	-3,8	CBNSHL IV degree, borderline with deafness
18	1	100	110	0,89	0,54	14	4	0,64	0,31	-3,6	0,2	CBNSHL IV degree, borderline with deafness
19	1	93,75	98,75	0,8	0,5	-10	-5	0,6	0,31	-2,2	-2,1	CBNSHL IV degree, borderline with deafness
20	2	112	110	na	na	na	na	na	na	na	na	CBNSHL IV degree
21	1	92	98	na	na	na	na	na	na	na	na	CBNSHL IV degree
22	1	104	na	na	na	na	na	na	na	na	na	CBNSHL IV degree
23	1	120	120	0,36	0,29	-15	-10	0,28	0,34	-5,6	-6,3	CBNSHL IV degree, borderline with deafness
24	2	53,75	55	0,42	0,41	-12	-17	0,43	0,5	-1,2	-2,6	CBNSHL II degree
25	1	62,5	65	0,42	0,42	-5	-1	0,36	0,41	-2,3	-2,4	CBNSHL III degree
26	1	71	95	na	na	na	na	na	na	na	na	CBNSHL III degree	CBNSHL IV degree, borderline with deafness
27	1	110	110	0,41	0,39	0	0	0,34	0,38	-2,7	-3,1	CBNSHL IV degree, borderline with deafness
28	2	38,75	38,75	0,41	0,42	-1	-1	0,6	0,41	0,3	0,1	CBNSHL I degree
ENT - ear nose throat, TEOAE – transiently evoked otoacoustic emission, AD, AS - auriculus dexter / sinister (right, left ear), CBNSHL - Chronical bilateral neurosensory hearing loss
